# Supplementary material for: Circulating IGFBP-2 levels are inversely associated with the incidence of nonalcoholic fatty liver disease: A cohort study
Source: PubMed Central journal article supplement — J Int Med Res. 2020 Aug 7;48(8):0300060520935219. doi: 10.1177/0300060520935219 (PMC7707858; doi:10.1177/0300060520935219), 2020-08-07
Supplement: sj-pdf-1-imr-10.1177_0300060520935219.pdf [file sj-pdf-1-imr-10.1177_0300060520935219.pdf]

**Figure S1 Validation of ELISA kits**

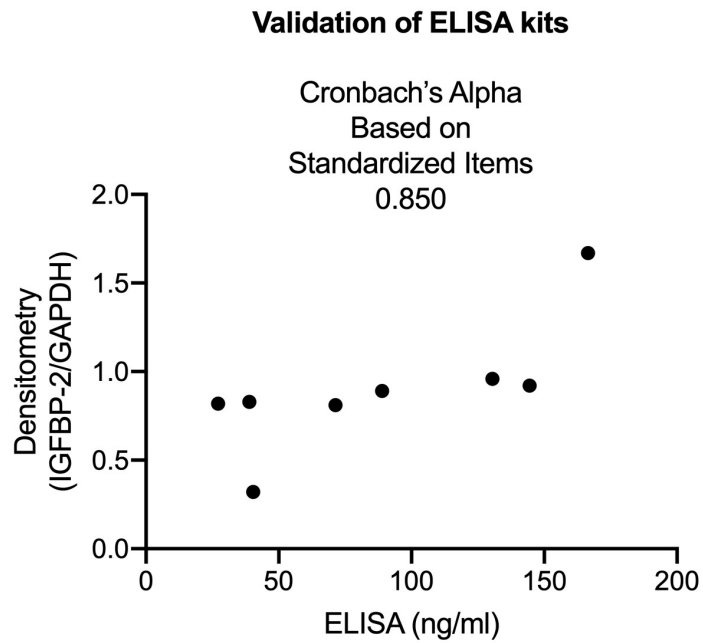

Validation of ELISA kit is based on Cronbach's Alpha test between ELISA tests

(Catalogue No. CSB-E04588h; CUSABIO Corp., Wuhan, China) and western blotting

(Anti-IGFBP-2, catalogue no. 3922; Cell Signaling Technology, Danvers, MA). A total of

eight samples was randomly selected. The ELISA kit showed an excellent consistency

with the quantified densitometry of IGFBP-2/GAPDH ratio (Cronbach's Alpha based on

standardized items = 0.850).
